# Supplementary material
Source: publisher figshare collection journal article supplement (https://future-science-group.figshare.com/ndownloader/files/28655964)

**Supplementary Figure 1. Mean PPPM healthcare costs pre- and post-switch among patients who switched.** ap < 0.01 vs apremilast. bp = 0.85 vs apremilast.
cp = 0.59 vs apremilast. dp = 0.71 vs apremilast. ILi: interleukin inhibitor; PPPM: per-patient per-month; TNFi: tumor necrosis factor inhibitor.


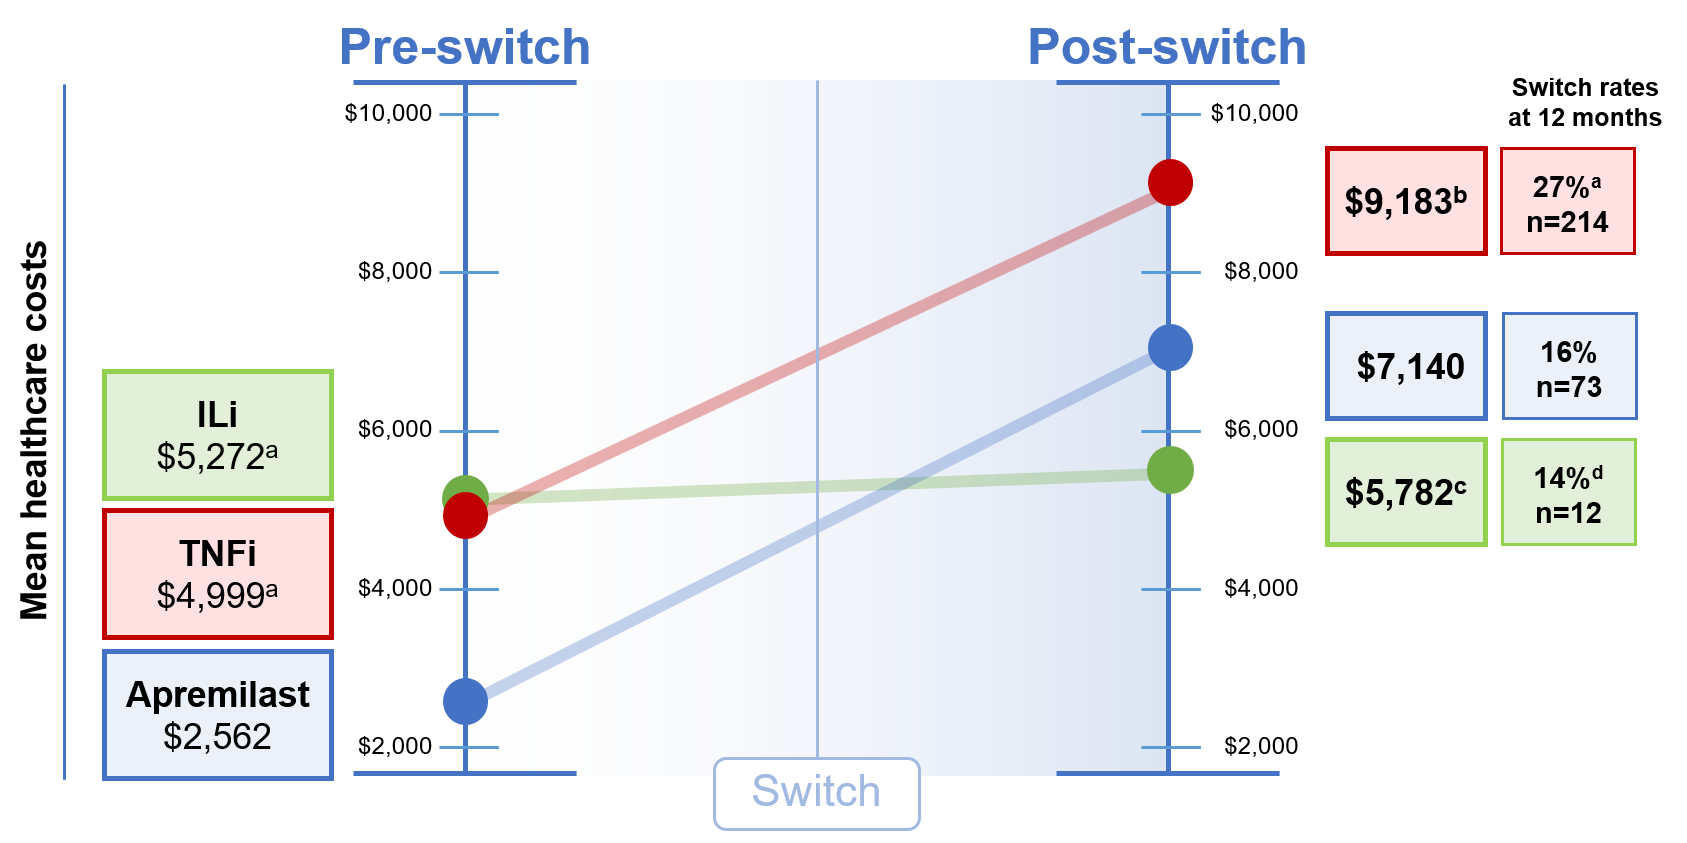

Supplement: Supplementary file 1 [file 28655964]
